# Supplementary material
Source: Springer Nature journal article supplement (https://www.springermedizin.de/resource/supplementary/13012_2013_631_MOESM1_ESM.pdf/9630398)

**1**

Define  
Change  
Project

**2**

Assign &  
Train  
Change  
Leader

**3**

Assign &  
Train  
Change  
Team

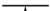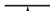

**4**

Allocate  
Sufficient  
Resources

**6**

Perform Walk-through

**7**

Select Project Aim

**8**

Measure Baseline

**9**

Select Changes to Test

**10**

Test Changes

**11**

Sustain Improvements

**12**

Tell Your Story

**5**

Monitor  
Progress

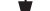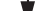

Supplement: MOESM1 [file 9630398]
